# Supplementary material for: Evidence-based diagnostic use of VEMPs
Source: Springer Nature journal article supplement (doi:10.1007/s00106-019-00767-2), 2020-06-12
Supplement: MOESM1 [file 18077562]

1 **Online supplementary material**

2 **„Evidence-based diagnostic use of VEMPs. From neurophysiological principles to clinical**  
3 **application“**

4 Julia Długaiczek

5

6 **S1: The striola - an ideal „jerk“ detector**

7 Vestibular hair cells and afferents in the striola of the otolith organs display several anatomical,  
8 biomechanical and neurophysiological peculiarities as compared to the extrastriola, which make  
9 this region ideally suited for the detection of high-frequency changes in linear acceleration  
10 („jerks“) within the transient (=dynamic) channel of otolithic function (see [21, 23, 26, 58]).

11 First, the particularly short and stiff hair bundles of striolar hair cells are only tenuously attached  
12 to the overlying gel layer of the otoconial membrane and move freely within vertical  
13 endolymph-filled channels of the gel layer. Due to their stiffness, the stereocilia are deflected  
14 even by small shearing forces caused by relative motion between the neuro-epithelium and the  
15 otoconial layer. Furthermore, the hair bundles are almost instantaneously dragged with the  
16 endolymph motion as they are only loosely attached to the gel layer above them. Thus, sound  
17 waves up to 3 kHz (i.e. 3,000 cycles of fluid displacement per second) are translated into almost  
18 synchronous oscillations of the receptor potential in striolar vestibular hair cells (for details see  
19 S3 and [65, 66]).

20 The biomechanical properties of striolar hair cells are complemented by the high temporal  
21 precision of the ultra-fast cup-shaped calyx synapses between type I striolar hair cells and their  
22 postsynaptic afferents (Fig. 2b, c; [76]). The highly specialized synaptic cleft is able to maintain  
23 high concentrations of K<sup>+</sup> ions that depolarize the hair cell membrane (thus increasing the  
24 likelihood of transmitter release) and the postsynaptic vestibular afferent (thus bringing it closer

25 to the threshold for triggering action potentials) [9]. This so called „non-quantal“ synaptic  
26 transmission (in addition to the „quantal“ exocytosis of glutamate vesicles) enhances the  
27 temporal precision of the calyx synapse required to encode high-frequency changes in linear  
28 acceleration [22, 23].

29 Finally, striolar hair cells are mainly contacted by vestibular afferents with irregular resting  
30 discharge that are particularly sensitive to transient (=dynamic) vestibular stimuli due to their  
31 membrane properties [31]. In summary, all these specializations of the striola form the basis for  
32 encoding fast changes in linear acceleration with high temporal precision. This is the  
33 prerequisite for using sound and vibration with stimulus frequencies of 500 Hz and more as  
34 stimuli for VEMP recordings (see S2 and [22, 23]).

35

## 36 **S2: Sound and vibration as otolithic stimuli**

37 Going back to physics, a sound wave (ACS or BCV) is defined as an oscillation of pressure  
38 propagated through a medium, i.e. a repetitive acceleration and deceleration of particles within  
39 the medium. This principle is illustrated by an animation of a longitudinal sound wave  
40 (<https://www.doccity.com/en/news/physics/physics-sound-visual-representation-gifs/>) and the  
41 sound-induced periodic movement of styrofoam beads in a Kundt's tube  
42 (<https://www.youtube.com/watch?v=NHAHR5ingRU>) (websites accessed on April 23<sup>rd</sup>,  
43 2020).

44 Accordingly, each cycle of an ACS or BCV stimulus is able to evoke a pressure wave within  
45 the vestibulum resulting in periodic movements of the utricular and saccular maculae and  
46 subsequent deflection of their hair cell stereocilia. A stimulus frequency of 500 Hz is equivalent  
47 to 500 changes in acceleration per second – an ideal jerk stimulus [21, 26].

48

49

50 **S3: Vestibular microphonics**

51 The effect of ACS and BCV on vestibular hair cells of the utricular macula was analyzed in  
52 detail in a guinea pig model: oscillations of the utricular macula evoked by application of sound  
53 or vibration to the guinea pig's skull were measured by laser Doppler vibrometry showing that  
54 the utricular macula moved with the stimulus frequency up to several kHz. Simultaneous  
55 recordings of utricular microphonics revealed a periodic de- and repolarisation of the utricular  
56 hair cells, again in sync with the stimulus frequency [65, 66].

57 In summary, these experiments provide evidence that sound and vibration are able to induce  
58 motion in the utricular macula with subsequent hair cell de- and repolarisation, which is the  
59 prerequisite for activation of otolith afferents during VEMP recordings.

60

61 **S4: Superior canal dehiscence**

62 In superior canal dehiscence (SCD), a defect in the thin bone of the middle cranial fossa  
63 overlying the superior (= anterior) semicircular canal creates a third mobile window in the  
64 labyrinth – beside the round and oval windows. If sound energy enters the inner ear *via* the oval  
65 window in SCD, part of the energy is shunted away from the cochlea through the newly created  
66 low-impedance pathway in the superior semicircular canal towards the third window. The  
67 resulting endolymph displacement is now strong enough to deflect the hair cell stereocilia in  
68 the crista of the superior canal – quite in contrast to the situation in the intact bony labyrinth –  
69 resulting in the typical clinical signs and symptoms of SCD, such as sound-induced nystagmus  
70 and vertigo (Tullio phenomenon; see Infobox and [35, 75, 83]).

71 SCD is frequently overdiagnosed in high-resolution computed tomography (HRCT) of the  
72 temporal bone with 1 mm slice thickness. Therefore, a resolution of  $\leq 0.6$  mm in HRCT is

73 recommended for the diagnosis of SCD in addition to at least one clinical symptom and one  
74 audio-vestibular finding compatible with a third window, e.g. increased VEMP amplitudes of  
75 the affected labyrinth [83]. Ocular VEMPs provide a higher diagnostic accuracy for detecting  
76 SCD than cVEMPs [88].
